# Supplementary material for: Rational modifications on ruthenium terpyridine sensitizers with large Jsc for dye-sensitized solar cells: combined DFT and relativistic TDDFT studies
Source: Royal Society of Chemistry journal article supplement (doi:10.1039/c5ra17237c), 2015-01-01
Supplement: c5ra17237c1.pdf [file c5ra17237c1.pdf]

## Supplementary Information

### Rational Modifications on Ruthenium

### Terpyridine Sensitizers with large $J_{sc}$ for Dye-

### Sensitized Solar Cells: A Combined DFT and Relativistic TDDFT Studies

Wei Du,<sup>a</sup> Hai-Bin Li,<sup>a</sup> Dong-Mei Gu,<sup>a</sup> Yong Wu,<sup>a</sup> Guang-Yan Sun,<sup>b</sup> Yun Geng<sup>a\*</sup> and Zhong-Min Su<sup>a\*</sup>

<sup>a</sup> Institute of Functional Material Chemistry, Faculty of Chemistry, Northeast Normal University, Changchun 130024, P. R. China

<sup>b</sup> Department of Chemistry, Faculty of Science, Yanbian University, Yanji, Jilin, 133002, China.

**Fig.S1** The fully optimized structures of **DX1-DX5** in gas phase by PBE0. (The basis set for Ru is SDD and for non-metal atoms is 6-31G\*)

**Fig. S2** The calculated absorption spectrum (the black line) and experimental one (the red line) of **DX1**.

**Fig. S3** Optimized configuration of **DX5/TiO<sub>2</sub>** complex (binding patterns with respect to the triazine ring).

**Table S1** The O1-Ti1 and O2-Ti2 distances of the **DX4/TiO<sub>2</sub>** and **DX5/TiO<sub>2</sub>** complexes (binding patterns with respect to the pyrimidine and triazine ring, respectively)

**Fig.S4** Schematic representation of the model used to evaluate the CB shift caused by the sensitizer adsorption for **DX2** in DMF. (The black line represents (TiO<sub>2</sub>)<sub>38</sub> cluster DOS. The blue line represents (TiO<sub>2</sub>)<sub>38</sub> cluster contribution to the total DOS.)

**Fig.S5** Schematic representation of the model used to evaluate the CB shift caused by the sensitizer adsorption for **DX3** in DMF. (The black line represents (TiO<sub>2</sub>)<sub>38</sub> cluster DOS. The blue line represents (TiO<sub>2</sub>)<sub>38</sub> cluster contribution to the total DOS.)

**Fig.S6** Schematic representation of the model used to evaluate the CB shift caused by

the sensitizer adsorption for **DX4** in DMF. (The black line represents  $(\text{TiO}_2)_{38}$  cluster DOS. The blue line represents  $(\text{TiO}_2)_{38}$  cluster contribution to the total DOS.)

**Fig.S7** Schematic representation of the model used to evaluate the CB shift caused by the sensitizer adsorption for **DX5** in DMF. (The black line represents  $(\text{TiO}_2)_{38}$  cluster DOS. The blue line represents  $(\text{TiO}_2)_{38}$  cluster contribution to the total DOS.)

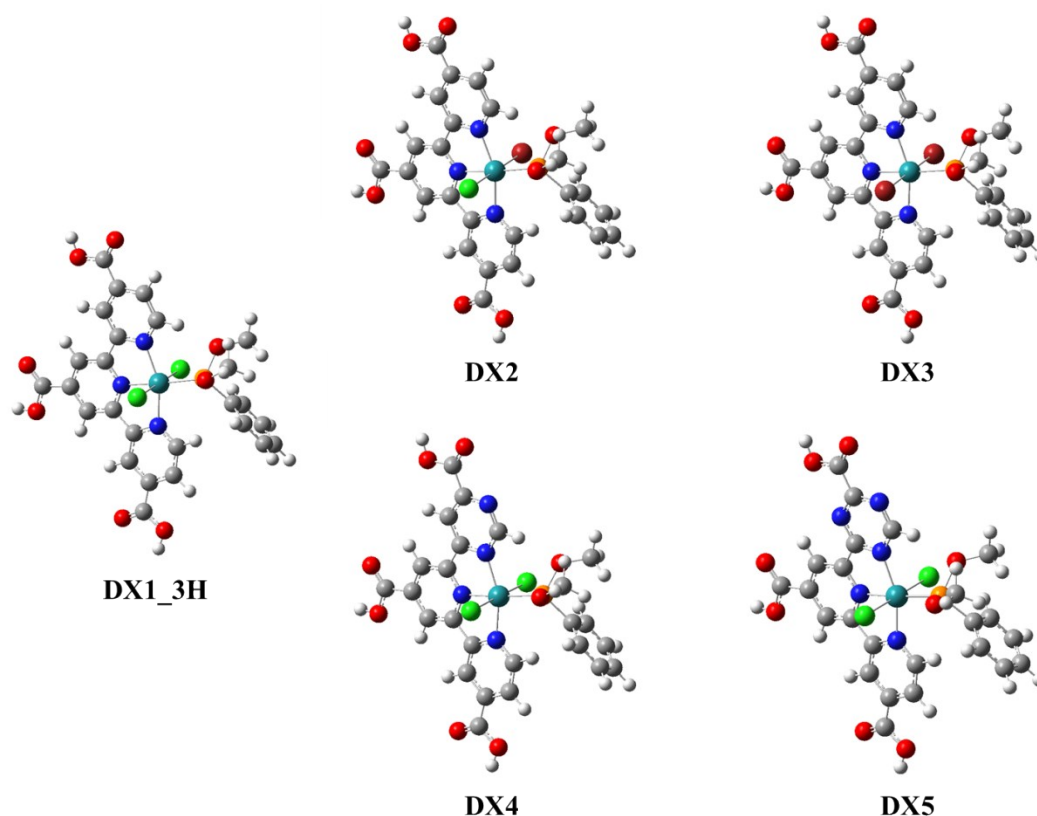

**Fig.S1** The fully optimized structures of **DX1-5** in gas phase by PBE0. (The basis set for Ru is SDD and for non-metal atoms is 6-31G\*)

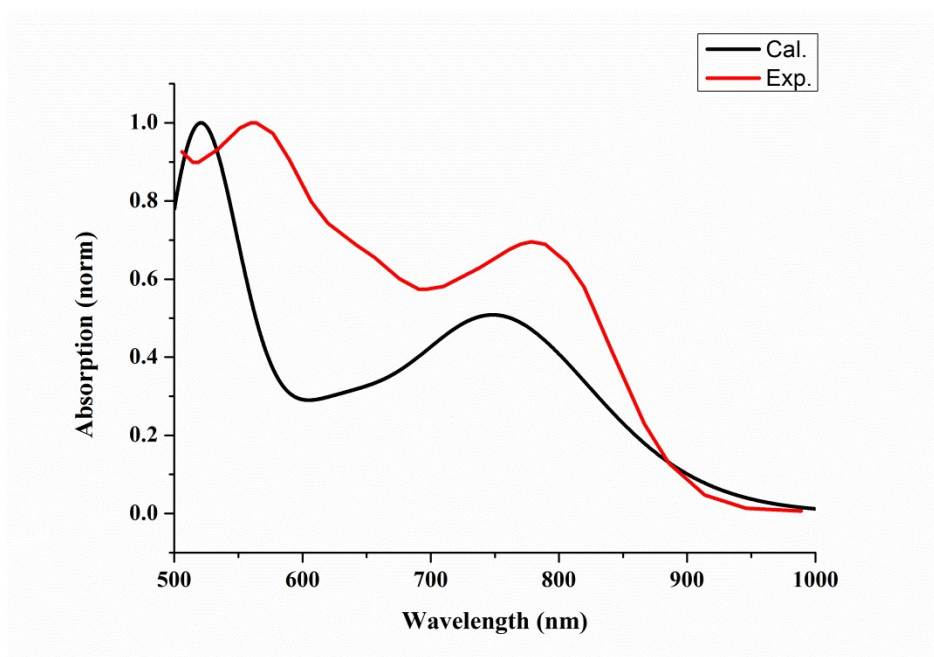

**Fig.S2** The calculated absorption spectrum (the black line) and experimental one (the red line) of **DX1**.

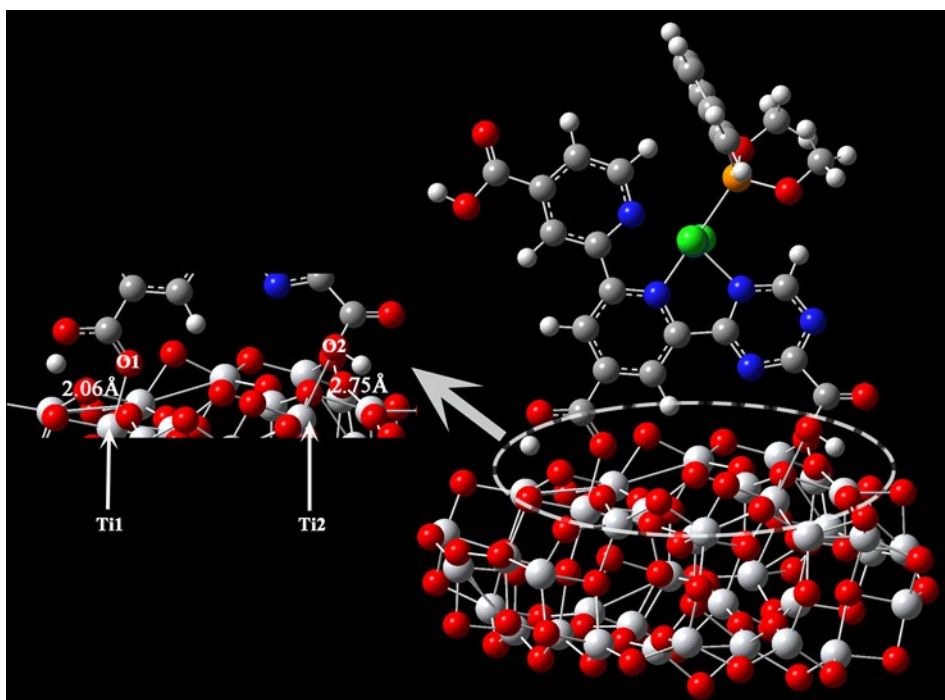

**Fig. S3** Optimized configuration of **DX5/TiO<sub>2</sub>** complex (binding patterns with respect to the triazine ring). The left structure represents a magnified image of the selected part of **DX5/TiO<sub>2</sub>** (dashed circle). The distances between O atoms of **DX5** and Ti atoms of the **TiO<sub>2</sub>** are also shown.

**Table S1** The O1-Ti1 and O2-Ti2 distances of the **DX4/TiO<sub>2</sub>** and **DX5/TiO<sub>2</sub>** complexes (binding patterns with respect to the pyrimidine and triazine ring, respectively) (the unit is Å).

|        | <b>DX4</b> | <b>DX5</b> |
|--------|------------|------------|
| O1-Ti1 | 1.90       | 2.06       |
| O2-Ti2 | 3.58       | 2.75       |

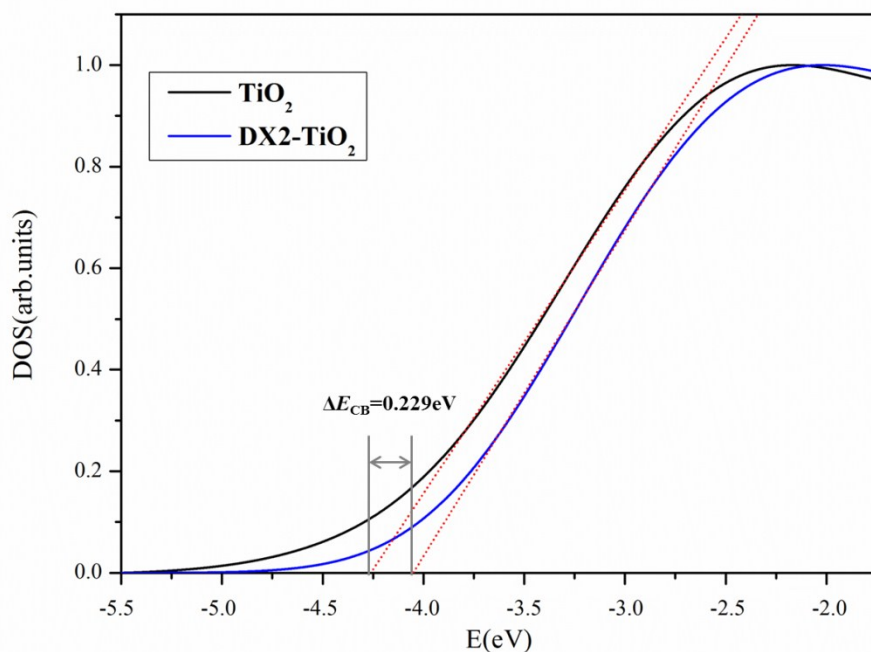

**Fig.S3** Schematic representation of the model used to evaluate the CB shift caused by the sensitizer adsorption for **DX2** in DMF. (The black line represents **(TiO<sub>2</sub>)<sub>38</sub>** cluster DOS. The blue line represents **(TiO<sub>2</sub>)<sub>38</sub>** cluster contribution to the total DOS.)

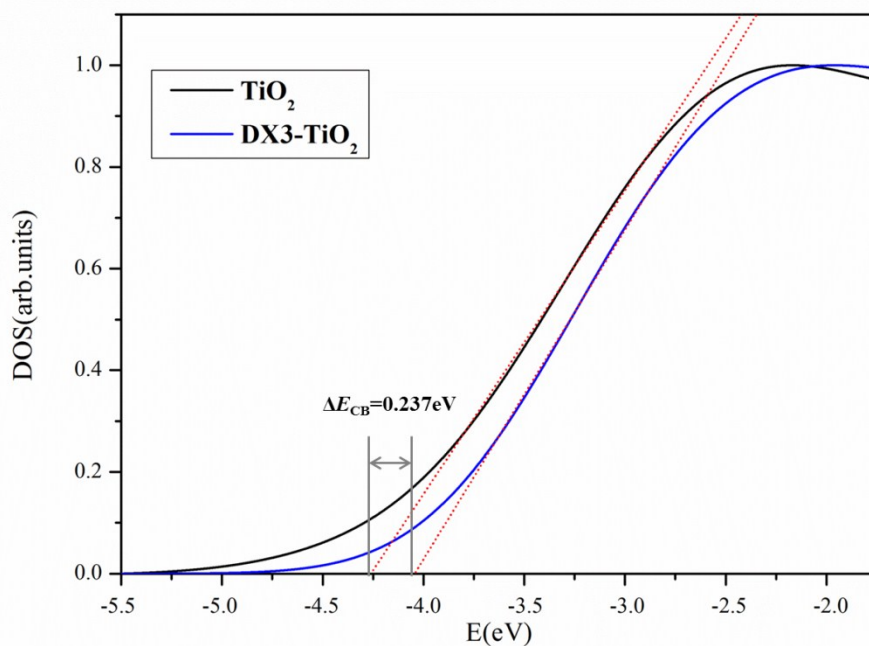

**Fig.S4** Schematic representation of the model used to evaluate the CB shift caused by the sensitizer adsorption for **DX3** in DMF. (The black line represents  $(\text{TiO}_2)_{38}$  cluster DOS. The blue line represents  $(\text{TiO}_2)_{38}$  cluster contribution to the total DOS.)

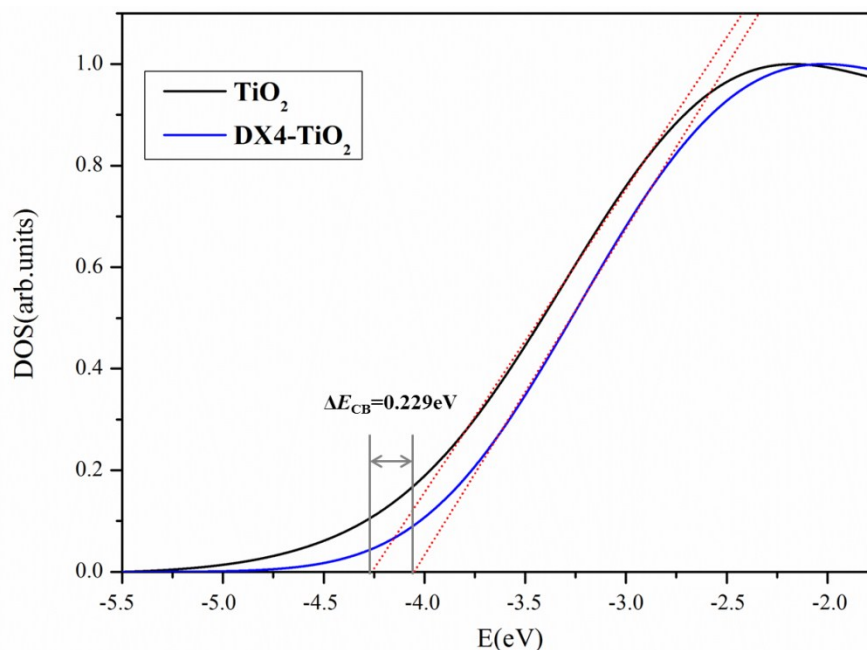

**Fig.S5** Schematic representation of the model used to evaluate the CB shift caused by the sensitizer adsorption for **DX4** in DMF. (The black line represents  $(\text{TiO}_2)_{38}$  cluster DOS. The blue line represents  $(\text{TiO}_2)_{38}$  cluster contribution to the total DOS.)

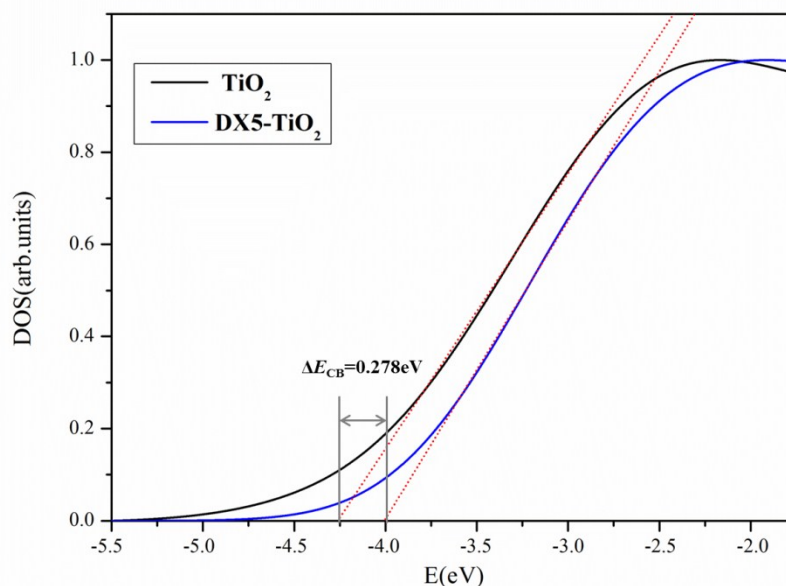

**Fig.S6** Schematic representation of the model used to evaluate the CB shift caused by the sensitizer adsorption for **DX5** in DMF. (The black line represents  $(\text{TiO}_2)_{38}$  cluster DOS. The blue line represents  $(\text{TiO}_2)_{38}$  cluster contribution to the total DOS.)
